# Supplementary material for: Electrospun nanofiber membrane of chitosan/polyvinyl alcohol embedded with DOX-loaded V-MOFs for controlled drug release and multifunctional biological activity
Source: Royal Society of Chemistry journal article supplement (doi:10.1039/d6ra01018k), 2026-04-01
Supplement: d6ra01018k1.pdf [file d6ra01018k1.pdf]

**Electrospun nanofiber membrane of chitosan/polyvinyl alcohol embedded with DOX-loaded V-MOFs for controlled drug release and multifunctional biological activity**

Table S1. Chemical name, formula, and company.

| <b>Chemical name</b>             | <b>Formula</b>        | <b>Company</b>             |
|----------------------------------|-----------------------|----------------------------|
| Chitosan                         | $C_{56}H_{103}N_9O_3$ | Sigma-Aldrich, Germany     |
| Polyvinylalcohol                 | $(C_2H_3O)_n$         | Sigma-Aldrich, Germany     |
| Vanadium chloride                | $VCl_3$               | Sigma-Aldrich, Germany     |
| benzene-1,3,5-tricarboxylic acid | $C_6H_3(CO_2H)_3$     | Sigma-Aldrich, Germany     |
| Methanol                         | $CH_3OH$              | LOBA CHEMIE PVT.LTD, India |
| Ethanol                          | $C_2H_6O$             | Sigma-Aldrich, Germany     |
| Sodium hydroxide (99%, AR)       | NaOH                  | Chimmed, Russia            |
| Hydrochloric acid (37%, AR)      | HCl                   | LOBA CHEMIE PVT.LTD, India |

Table S2. Instruments and equipments.

| Test name                        | Abbreviation | Instrument name                                               | Company                                    | Illustration                                                                                                                                                                                                                         |
|----------------------------------|--------------|---------------------------------------------------------------|--------------------------------------------|--------------------------------------------------------------------------------------------------------------------------------------------------------------------------------------------------------------------------------------|
| Fourier transformer infrared     | FT-IR        | A Nicolet IS10 Fourier transform infrared (FTIR) spectrometer | Thermo Fisher Scientific, Waltham, MA, USA | equipped with an attenuated total reflectance accessory and which ran in the 4000-400 $\text{cm}^{-1}$ range was used to gather FTIR spectra                                                                                         |
| Powered X-ray diffraction        | PXRD         | Siemens diffractometer (model D500, Germany)                  | Germany                                    | patterns were captured from powder samples through the use of a Siemens diffractometer (model D500, Germany) that was fitted with a Cu-K radiation source (wavelength 1.54 Angstroms ( $\text{\AA}$ )) operating at 30 kV and 20 mA. |
| Scanning Electron Microscope     | SEM          | (JSM-6510LV, JEOL Ltd., Tokyo, Japan)                         | JEOL Ltd., Tokyo, Japan                    | The morphology of the investigated sorbents was analyzed with the use of a scanning electron microscope                                                                                                                              |
| X-ray photoelectron spectroscopy | XPS          | K-ALPHA (Thermo Fisher Scientific, USA)                       | Thermo Fisher Scientific, USA              | Used for determination the elemental analysis for the compound                                                                                                                                                                       |
| Braunnar Emmet Teller            | BET          | Quantachrome Instruments, Anton Paar                          | Quanta Tec, Inc., Boynton Beach, FL, USA   | was utilised for surface and pore analysis (Brunauer Emmett-Teller (BET) surface area, porous volume, and pore size), and NovaWin Software (v11.0) was used for data interpretation.                                                 |

|                                  |                      |                                                                             |                                                       |  |                                                                                                                                                                                                            |
|----------------------------------|----------------------|-----------------------------------------------------------------------------|-------------------------------------------------------|--|------------------------------------------------------------------------------------------------------------------------------------------------------------------------------------------------------------|
|                                  |                      | USA                                                                         |                                                       |  | The BET surface area of material adsorbents was obtained by the application of nitrogen adsorption-desorption isotherms at 77K through the use of a specific analyser (Quadratorb-EVO, Quantachrome, USA). |
| UV-visible spectrophotometer     | UV spectrophotometer | Perkin-Elmer AA800 spectrophotometer<br>Double beam, with 1 cm cell length. |                                                       |  | Measuring the concentration of the adsorbate solution via using Beer Lambert law                                                                                                                           |
| Energy Dispersive X-ray          | EDX                  | Leo1430VP microscope                                                        | Carl Zeiss AG,<br>Jena, Germany                       |  | Elemental analysis of the material                                                                                                                                                                         |
| Transmission electron microscopy | TEM                  | TEM, FEI Teanci G2 F20, USA                                                 | FEI Teanci G2 F20, USA                                |  | Determination the morphology of the material and size                                                                                                                                                      |
| pH meter                         | pH                   | HANNA (model 211)                                                           | USA                                                   |  | Measuring the acidity or basicity of the solution                                                                                                                                                          |
| Sonication                       | Ultrasonic           | Elmasonic ultrasonic continuous mode, power 380 W                           | P300H bath,<br>Elma Schmidbauer GmbH, Singen, Germany |  | Sonication of the material as well as used to disperse material on the solution as it decreases the particle size of the material                                                                          |
| Water bath                       | Shaking              | GFL 3017                                                                    | Orbital Shaker                                        |  |                                                                                                                                                                                                            |

Table S3. True variables, codes, and their BBD levels.

| <b>Code</b> | <b>Variables</b> | <b>-1</b> | <b>0</b> | <b>+1</b> |
|-------------|------------------|-----------|----------|-----------|
| A           | pH               | 5         | 6.2      | 7.4       |
| B           | Temperature (°C) | 25        | 33.5     | 42        |
| C           | Time (h.)        | 5         | 52.5     | 100       |

Table S4. Investigate the percentage of DOX release and the surface interactions.

| <b>Run</b> | <b>Actual variables</b> |                 |                         | <b>DOX release (%)</b> |                  |                |
|------------|-------------------------|-----------------|-------------------------|------------------------|------------------|----------------|
|            | <b>pH</b>               | <b>Time (h)</b> | <b>Temperature (°C)</b> | <b>Investigational</b> | <b>Predicted</b> | <b>Residue</b> |
| 1          | 6.2                     | 62.5            | 31                      | 36.179                 | 36.18            | 0.0000         |
| 2          | 6.2                     | 62.5            | 31                      | 36.179                 | 36.18            | 0.0000         |
| 3          | 6.2                     | 5               | 25                      | 2.556                  | 3.03             | -0.4786        |
| 4          | 6.2                     | 62.5            | 31                      | 36.179                 | 36.18            | 0.0000         |
| 5          | 5                       | 62.5            | 37                      | 52.46                  | 52.24            | 0.2219         |
| 6          | 6.2                     | 5               | 37                      | 3.88                   | 4.29             | -0.4128        |
| 7          | 5                       | 62.5            | 25                      | 32.7875                | 32.50            | 0.2877         |
| 8          | 5                       | 5               | 31                      | 3.73                   | 3.54             | 0.1909         |
| 9          | 6.2                     | 120             | 37                      | 77.2                   | 76.72            | 0.4786         |
| 10         | 6.2                     | 120             | 25                      | 50.7895                | 50.38            | 0.4128         |
| 11         | 6.2                     | 62.5            | 31                      | 36.179                 | 36.18            | 0.0000         |
| 12         | 7.4                     | 5               | 31                      | 2.5129                 | 1.81             | 0.7005         |
| 13         | 7.4                     | 62.5            | 37                      | 32.78                  | 33.07            | -0.2877        |
| 14         | 6.2                     | 62.5            | 31                      | 36.179                 | 36.18            | 0.0000         |
| 15         | 7.4                     | 62.5            | 25                      | 24.981                 | 25.20            | -0.2219        |
| 16         | 7.4                     | 120             | 31                      | 50                     | 50.19            | -0.1909        |
| 17         | 5                       | 120             | 31                      | 74.2308                | 74.93            | -0.7005        |

Table S5. Equations used in this work to fit the data of adsorption experiments.

| Serial | Equation                                 | Nmae                 | Description                                                                                                                                                                                                                                                                                                                                                                                                 | Ref. |
|--------|------------------------------------------|----------------------|-------------------------------------------------------------------------------------------------------------------------------------------------------------------------------------------------------------------------------------------------------------------------------------------------------------------------------------------------------------------------------------------------------------|------|
| 1      | $Q_0^{1/3} - Q_t^{1/3} = K_{HC} \cdot t$ | Hixson–Crowell model | <p><math>Q_0</math> = Initial amount of drug</p> <p><math>Q_t</math> = Remaining amount of drug at time t</p> <p><math>K_{HC}</math> = Hixson–Crowell dissolution rate constant</p> <p>t = Time</p>                                                                                                                                                                                                         | [1]  |
| 2      | $Q_t = Q_0 + K_0 \cdot t$                | Zero-Order           | <p><math>Q_t</math> = Amount of drug released at time ttt</p> <p><math>Q_0</math> = Initial amount of drug in the solution (often 0)</p> <p><math>K_0</math> = Zero-order release constant (units: concentration/time)</p> <p>t = Time</p>                                                                                                                                                                  | [2]  |
| 3      | $\ln Q_t = \ln Q_0 - K_1 \cdot t$        | First order          | <p><math>Q_0</math> = Initial amount of drug</p> <p><math>Q_t</math> = Amount of drug remaining at time ttt</p> <p><math>K_1</math> = First-order rate constant (1/time)</p> <p>t = Time</p>                                                                                                                                                                                                                | [3]  |
| 4      | $\frac{M_t}{M_\infty} = K \cdot t^n$     | Korsmeyer–Peppas     | <p><math>M_t</math> = Amount of drug released at time ttt</p> <p><math>M_\infty</math> = Total amount of drug released at infinite time (i.e., final amount)</p> <p><math>\frac{M_t}{M_\infty}</math> = Fraction of drug released at time t</p> <p>K = Kinetic constant incorporating structural and geometric characteristics</p> <p>n = Release exponent that indicates the mechanism of drug release</p> | [4]  |
| 5      | $Q_t = K_H \sqrt{t}$                     | Higuchi              | <p><math>Q_t</math> = Cumulative amount of drug released at time t</p> <p><math>K_H</math> = Higuchi dissolution constant (units: amount/time<sup>1/2</sup>)</p> <p>t = Time</p>                                                                                                                                                                                                                            | [5]  |

Table S6. The parameter of the kinetic models of DOX release from V-MOF nanofiber membrane

| <b>Kinetic model</b> | <b>Value of parameters</b> |           |
|----------------------|----------------------------|-----------|
| Zero-order           | $K_o$ (h)                  | 1.12      |
|                      | Reduced Chi-Sqr            | 732.2892  |
|                      | Residual Sum of Squares    | 0.94625   |
|                      | R-Square (COD)             | 0.89538   |
|                      | $R^2$                      | 0.89062   |
| First-order          | $K_F$ ( $h^{-1}$ )         | 0.39      |
|                      | Reduced Chi-Sqr            | 227.04921 |
|                      | Residual Sum of Squares    | 0.98205   |
|                      | R-Square (COD)             | 0.96443   |
|                      | $R^2$                      | 0.96273   |
| Hexson-crowell       | $K_{HC}$ ( $h^{-1}$ )      | 0.77      |
|                      | Reduced Chi-Sqr            | 1507.1648 |
|                      | Residual Sum of Squares    | 0.78971   |
|                      | R-Square (COD)             | 0.62364   |
|                      | $R^2$                      | 0.60653   |
| Kosmeyer-peppas      | $K_F$ ( $h^{-1}$ )         | 0.12      |
|                      | n                          | 0.007     |
|                      | Reduced Chi-Sqr            | 736.96025 |
|                      | Residual Sum of Squares    | 0.94588   |
|                      | R-Square (COD)             | 0.8947    |
|                      | $R^2$                      | 0.88991   |
| Higuchi              | $K_H$                      | 1.82      |
|                      | Reduced Chi-Sqr            | 2086.054  |
|                      | Residual Sum of Squares    | 0.9378    |
|                      | R-Square (COD)             | 0.863     |
|                      | $R^2$                      | 0.858     |

Table S7. The models have been subjected to analysis of variance.

| Source                   | Sum of squares | df | Mean squares | F-value  | P-value  |             |
|--------------------------|----------------|----|--------------|----------|----------|-------------|
| Model                    | 8266.13        | 9  | 918.46       | 3036.48  | < 0.0001 | significant |
| A-pH                     | 350.26         | 1  | 350.26       | 1157.97  | < 0.0001 |             |
| B-time                   | 7172.51        | 1  | 7172.51      | 23712.79 | < 0.0001 |             |
| C-Temperature            | 380.96         | 1  | 380.96       | 1259.49  | < 0.0001 |             |
| AB                       | 132.41         | 1  | 132.41       | 437.75   | < 0.0001 |             |
| AC                       | 35.25          | 1  | 35.25        | 116.52   | < 0.0001 |             |
| BC                       | 157.33         | 1  | 157.33       | 520.15   | < 0.0001 |             |
| A <sup>2</sup>           | 2.11           | 1  | 2.11         | 6.97     | 0.0335   |             |
| B <sup>2</sup>           | 34.28          | 1  | 34.28        | 113.32   | < 0.0001 |             |
| C <sup>2</sup>           | 0.3314         | 1  | 0.3314       | 1.10     | 0.3300   |             |
| Residual                 | 2.12           | 7  | 0.3025       |          |          |             |
| Lack of Fit              | 2.12           | 3  | 0.7058       |          |          |             |
| Pure Error               | 0.0000         | 4  | 0.0000       |          |          |             |
| Cor Total                | 8268.24        | 16 |              |          |          |             |
| Std. Dev.                | 0.5500         |    |              |          |          |             |
| Mean                     | 34.64          |    |              |          |          |             |
| C.V. %                   | 1.59           |    |              |          |          |             |
| R <sup>2</sup>           | 0.9997         |    |              |          |          |             |
| Adjusted R <sup>2</sup>  | 0.9994         |    |              |          |          |             |
| Predicted R <sup>2</sup> | 0.9959         |    |              |          |          |             |
| Adeq Precision           | 177.5884       |    |              |          |          |             |
| PRESS                    | 33.88          |    |              |          |          |             |
| -2 Log Likelihood        | 12.83          |    |              |          |          |             |
| BIC                      | 41.16          |    |              |          |          |             |
| AICc                     | 69.50          |    |              |          |          |             |

**Table S8.** Comparison of different nanocarriers based on MOFs for DOX delivery.

| Materials                                                             | Drug release        | Cell lines | Cell viability | Concentration | Treatment | Ref. |
|-----------------------------------------------------------------------|---------------------|------------|----------------|---------------|-----------|------|
| LDH-Fe <sub>3</sub> O <sub>4</sub> /Cu MOF-DOX-CS@CAR                 | pH 5.5 / 72h / 60%  | L929       | 95%            | 62.5 µg/mL    | 48h       | [6]  |
| CS (chitosan), CAR (carrageenan hydrogel)                             | pH 7.4 / 72h / 23%  | MCF-7      | 50%            |               |           |      |
| DOX- CS/Fe <sub>3</sub> O <sub>4</sub> /Cu-MOF                        | pH 4.5 / 96h / 60%  | MCF-7      | 65%            | 16 µg/mL      | 48h       | [7]  |
| CS (chitosan)                                                         | pH 7.4 / 96h / 20%  |            |                |               |           |      |
| CS/DOX@Ti-MOF                                                         | pH 6.5 / 48h / 76%  | MNNG/HOS   | 30%            | 6 µg/mL       | 48h       | [8]  |
| Cs (chitosan)                                                         | pH 7.4 / 48h / 10%  | MDA-MB-231 | 20%            |               |           |      |
| SiO <sub>2</sub> @Fe <sub>3</sub> O <sub>4</sub> -HA-MIL-100-GQDs-DOX | pH 5 / 70h / 67%    | MCF-7      | 5%             | 32 µg/mL      | 72h       | [9]  |
| HA (hydroxyapatite), GQDs (graphene quantum dots)                     | pH 7.4 / 70h / 29%  |            |                |               |           |      |
| Alg-DOX-Cu MOF-LDH                                                    | pH 5 / 72h / 69 %   | L929       | 90%            | 60 µg/mL      | 48h       | [10] |
| Alg (alginate)                                                        | pH 6.8 / 72h / 39%  | MCF-7      | 10%            |               |           |      |
|                                                                       | pH 7.4 / 72h / 29%  |            |                |               |           |      |
| UiO-66 @P @ DOX                                                       | pH 4.5/ 200h /90%   | HEK-293    | 40%            | 50 µg/mL      | 48h       | [11] |
| P (porphyrin)                                                         | pH 5.5 / 200h /70%  | HT-29      | 60%            |               |           |      |
|                                                                       | pH 7.4 / 200h /85%  | MCF-7      | 20%            |               |           |      |
|                                                                       |                     | MCF-10A    | 60%            |               |           |      |
| UiO-66 @P @ DOX@RO                                                    | pH 4.5 / 200h / 40% | HEK-293    | 80%            | 50 µg/mL      | 48h       | [11] |
| P (porphyrin), RO ( <i>Rosmarinus officinalis</i> )                   | pH 5.5 / 200h / 60% | HT-29      | 80%            |               |           |      |
|                                                                       | pH 7.4 / 200h / 50% | MCF-7      | 65%            |               |           |      |
|                                                                       |                     | MCF-10A    | 80%            |               |           |      |
| A520@L@DOX                                                            | pH 4.5/ 200h / 94%  | HEK-293    | 95%            | 50 µg/mL      | 48h       | [12] |
|                                                                       | pH 5.5 / 200h / 97% | HeLa       | 65%            |               |           |      |
|                                                                       | pH 7.4 / 200h / 96% | MCF-7      | 76%            |               |           |      |
|                                                                       |                     | PC12       | 70%            |               |           |      |
| A520@L@DOX@L                                                          | pH 4.5 / 150h / 36% | HEK-293    | 96%            | 50 µg/mL      | 48h       | [12] |
|                                                                       | pH 5.5 / 150h / 49% | HeLa       | 90%            |               |           |      |
|                                                                       | pH 7.4 / 150h / 88% | MCF-7      | 90%            |               |           |      |
|                                                                       |                     | PC12       | 83%            |               |           |      |

|                              |                       |        |      |             |    |            |
|------------------------------|-----------------------|--------|------|-------------|----|------------|
| DOX@V-MOF nanofiber membrane | pH 5 / 140h / 96.14%  | HepG-2 | 97.2 | 107.5 µg/mL | 50 | This study |
|                              | pH 6.2 / 140h / 58.4% | MCF-7  | 96.4 |             |    |            |
|                              | pH 7.4 / 10h / 34.6%  |        |      |             |    |            |

**Table S9.** Using different MOFs with different coating agents on different cell lines.

| MOFs                         | Coating agents                  | Cell lines                  | Ref.       |
|------------------------------|---------------------------------|-----------------------------|------------|
| Silver-Based MOF             | Chitosan                        | L929                        | [13]       |
| BioMOF                       | Chitosan                        | HUVEC                       | [14]       |
| UiO-66                       | Fe3O4 Nanoparticles             | HeLa, NIH/3T3               | [15]       |
| UiO-66                       | Aloe vera Biopolymer            | HFFF2                       | [16]       |
| UiO-66                       | PEG                             | MCF-7                       | [17]       |
| UiO-68                       | Aptamer                         | MDA-MB-23 , MCF-10A         | [18]       |
| Cu MOF                       | L-lysine                        | MCF-7 , MCF-10A             | [19]       |
| Cu MOF                       | Aptamer                         | Aptamer                     | [20]       |
| MIL-100(Fe)                  | Silica                          | MCF-7 , MCF-10A             | [21]       |
| MIL-100(Fe)                  | PEG                             | MCF-7                       | [22]       |
| ZIF-8                        | Chitosan & Folic acid           | MCF-7                       | [23]       |
| MIL-88B                      | Chitosan & Folic acid           | M109                        | [24]       |
| Ni/Ta MOF                    | Chitosan & Folic acid           | MCF-7 , HepG2               | [25]       |
| Zn-NMOF                      | Chitosan & Folic acid           | HCT116                      | [26]       |
| MOF-5                        | Chitosan & Alginate             | HEK-293 , PC12 , HepG2      | [27]       |
| MOF-5                        | Carboxymethylcellulose, Aptamer | HeLa , 4TA                  | [28]       |
| UiO-66-NH2                   | Porphyrin                       | MCF-7 , HT-29               | [11]       |
| beta- CD- MOF                | Glutamine                       | MCF-7 , AGS                 | [29]       |
| Bio-MOF-11                   | Pectin Biopolymer               | SW489                       | [30]       |
| Fe-BTC MOF                   | Liposome                        |                             | [31]       |
| A520                         | Tp Extract                      | MCF-7 , HeLa, HEK-293, PC12 | [12]       |
| DOX@V-MOF nanofiber membrane | Chitosan and polyvinylalcohol   | HepG-2, MCF-7               | This study |

## References

[1] K. Ramteke, P. Dighe, A. Kharat, S. Patil, Mathematical models of drug dissolution: A review, Sch. Acad. J. Pharm, 3 (2014) 388-396.

- [2] B. Narasimhan, R. Langer, Zero-order release of micro-and macromolecules from polymeric devices: the role of the burst effect, *Journal of controlled release*, 47 (1997) 13-20.
- [3] N. Mulye, S. Turco, A simple model based on first order kinetics to explain release of highly water soluble drugs from porous dicalcium phosphate dihydrate matrices, *Drug development and industrial pharmacy*, 21 (1995) 943-953.
- [4] A. Talevi, M.E. Ruiz, Korsmeyer-Peppas, Peppas-Sahlin, and Brazel-Peppas: Models of drug release, *The ADME Encyclopedia: A Comprehensive Guide on Biopharmacy and Pharmacokinetics*, Springer2022, pp. 613-621.
- [5] D. Paul, Elaborations on the Higuchi model for drug delivery, *International journal of pharmaceutics*, 418 (2011) 13-17.
- [6] A. Taghikhani, M. Babazadeh, S. Davaran, E. Ghasemi, Facile preparation of a pH-sensitive biocompatible nanocarrier based on magnetic layered double hydroxides/Cu MOFs-chitosan crosslinked  $\kappa$ -carrageenan for controlled doxorubicin delivery to breast cancer cells, *Colloids and Surfaces B: Biointerfaces*, 243 (2024) 114122.
- [7] M. Abbasian, M. Khayyat-alimohammadi, In-situ forming Cu-based metal-organic framework in the presence of chitosan-Fe<sub>3</sub>O<sub>4</sub> nanohybrids: A pH-sensitive carrier for controlled release of doxorubicin, *International Journal of Biological Macromolecules*, 278 (2024) 134224.
- [8] Y. Zeng, J. Yuan, Z. Ran, X. Zhan, X. Li, H. Ye, J. Dong, G. Cao, Z. Pan, Y. Bao, Chitosan/NH<sub>2</sub>-MIL-125 (Ti) scaffold loaded with doxorubicin for postoperative bone tumor clearance and osteogenesis: An in vitro study, *International Journal of Biological Macromolecules*, 263 (2024) 130368.
- [9] S. Karimi, V. Zeyni, H. Namazi, A fluorescent system based on graphene quantum dots-capped magnetic hydroxyapatite-MIL-100 metal-organic frameworks for pH-sensitive and controlled release of DOX, *Diamond and Related Materials*, 140 (2023) 110502.
- [10] S. Karimi, H. Rasuli, R. Mohammadi, Facile preparation of pH-sensitive biocompatible alginate beads having layered double hydroxide supported metal-organic framework for controlled release from doxorubicin to breast cancer cells, *International Journal of Biological Macromolecules*, 234 (2023) 123538.
- [11] S. Ahmadi, V. Jajarmi, M. Ashrafizadeh, A. Zarrabi, J.T. Haponiuk, M.R. Saeb, E.C. Lima, M. Rabiee, N. Rabiee, Mission impossible for cellular internalization: When porphyrin alliance

with UiO-66-NH<sub>2</sub> MOF gives the cell lines a ride, *Journal of Hazardous Materials*, 436 (2022) 129259.

[12] H. Daneshgar, M. Bagherzadeh, S. Sojdeh, M. Safarkhani, M. Edrisi, A. Ojaghi, S. Ahmadi, M. Kiani, N. Rabiee, Discovery of valley-hill structures on the surface of MOFs: Enhancing DOX diffusion and release through nature-made channels, *Nano Materials Science*, (2024).

[13] S.M. Dehnavi, M. Barjasteh, S.A. Seyedkhani, S.Y. Rahnamaee, R. Bagheri, A novel silver-based metal-organic framework incorporated into nanofibrous chitosan coatings for bone tissue implants, *International Journal of Pharmaceutics*, 640 (2023) 123047.

[14] R. Abazari, A.R. Mahjoub, F. Ataei, A. Morsali, C.L. Carpenter-Warren, K. Mehdizadeh, A.M. Slawin, Chitosan immobilization on bio-MOF nanostructures: a biocompatible pH-responsive nanocarrier for doxorubicin release on MCF-7 cell lines of human breast cancer, *Inorganic Chemistry*, 57 (2018) 13364-13379.

[15] H.-X. Zhao, Q. Zou, S.-K. Sun, C. Yu, X. Zhang, R.-J. Li, Y.-Y. Fu, Theranostic metal-organic framework core-shell composites for magnetic resonance imaging and drug delivery, *Chemical science*, 7 (2016) 5294-5301.

[16] H. Nabipour, S. Rohani, Zirconium metal organic framework/aloe vera carrier loaded with naproxen as a versatile platform for drug delivery, *Chemical Papers*, 77 (2023) 3461-3470.

[17] V. Gupta, S. Mohiyuddin, A. Sachdev, P. Soni, P. Gopinath, S. Tyagi, PEG functionalized zirconium dicarboxylate MOFs for docetaxel drug delivery in vitro, *Journal of Drug Delivery Science and Technology*, 52 (2019) 846-855.

[18] W.-H. Chen, X. Yu, A. Ceconello, Y.S. Sohn, R. Nechushtai, I. Willner, Stimuli-responsive nucleic acid-functionalized metal-organic framework nanoparticles using pH- and metal-ion-dependent DNazymes as locks, *Chemical science*, 8 (2017) 5769-5780.

[19] M.R. Moghadam, S. Karimi, H. Namazi, A targeted biosystem based on l-lysine coated GO@ rod-Cu (II) metal-organic frameworks for pH-controlled co-delivery of doxorubicin and curcumin, *Food Bioscience*, 58 (2024) 103578.

[20] M. Falsafi, M. Zahiri, A.S. Saljooghi, K. Abnous, S.M. Taghdisi, A. Sazgarnia, M. Ramezani, M. Alibolandi, Aptamer targeted red blood cell membrane-coated porphyrinic copper-based MOF for guided photochemotherapy against metastatic breast cancer, *Microporous and Mesoporous Materials*, 325 (2021) 111337.

- [21] F. Parsa, M. Setoodehkhah, S.M. Atyabi, Loading and release study of ciprofloxacin from silica-coated magnetite modified by iron-based metal-organic framework (MOF) as a noncarrier in targeted drug delivery system, *Inorganic Chemistry Communications*, 155 (2023) 111056.
- [22] P. Yadav, S. Kumari, A. Yadav, P. Bhardwaj, M. Maruthi, A. Chakraborty, P. Kanoo, Biocompatible Drug Delivery System Based on a MOF Platform for a Sustained and Controlled Release of the Poorly Soluble Drug Norfloxacin, *ACS omega*, 8 (2023) 28367-28375.
- [23] M. Ghaderpour, S. Kashanian, M. Nazari, M. Motiei, S. Sajadimajd, Targeted Delivery of Letrozole Using a Modified Metal–Organic Framework as a Promising Candidate in Breast Cancer Therapy, *BioNanoScience*, (2024) 1-14.
- [24] S. Dehghani, M. Hosseini, S. Haghgoo, V. Changizi, H. Akbari Javar, M. Khoobi, N. Riahi Alam, Multifunctional MIL-Cur@FC as a theranostic agent for magnetic resonance imaging and targeting drug delivery: in vitro and in vivo study, *Journal of drug targeting*, 28 (2020) 668-680.
- [25] S.-s. Jalaladdiny, A. Badoei-dalfard, Z. Karami, G. Sargazi, Co-delivery of doxorubicin and curcumin to breast cancer cells by a targeted delivery system based on Ni/Ta core-shell metal-organic framework coated with folic acid-activated chitosan nanoparticles, *Journal of the Iranian Chemical Society*, 19 (2022) 4287-4298.
- [26] Z. Khatibi, N.M. Kazemi, S. Khaleghi, Targeted and biocompatible NMOF as efficient nanocomposite for delivery of methotrexate to colon cancer cells, *Journal of Drug Delivery Science and Technology*, 73 (2022) 103441.
- [27] N. Rabiee, M. Bagherzadeh, M. Jouyandeh, P. Zarrintaj, M.R. Saeb, M. Mozafari, M. Shokouhimehr, R.S. Varma, Natural polymers decorated MOF-MXene nanocarriers for co-delivery of doxorubicin/pCRISPR, *ACS applied bio materials*, 4 (2021) 5106-5121.
- [28] S. Javanbakht, A. Hemmati, H. Namazi, A. Heydari, Carboxymethylcellulose-coated 5-fluorouracil@MOF-5 nano-hybrid as a bio-nanocomposite carrier for the anticancer oral delivery, *International journal of biological macromolecules*, 155 (2020) 876-882.
- [29] P. Sadeh, S. Zeinali, B. Rastegari, I. Najafipour, Functionalization of  $\beta$ -cyclodextrin metal-organic frameworks with gelatin and glutamine for drug delivery of curcumin to cancerous cells, *Heliyon*, 10 (2024).
- [30] H. Nabipour, Y. Hu, Development of fully bio-based pectin/curcumin@bio-MOF-11 for colon specific drug delivery, *Chemical Papers*, 76 (2022) 2969-2979.

[31] A. Karami, A. Ahmed, R. Sabouni, G.A. Hussein, M. Al Sharabati, N. AlSawaftah, V. Paul, Hybrid liposome/metal–organic framework as a promising dual-responsive nanocarriers for anticancer drug delivery, *Colloids and Surfaces B: Biointerfaces*, 217 (2022) 112599.
